# Supplementary material
Source: PubMed Central journal article supplement (PMC4808323)
Supplement: NIHMS741639-supplement.pdf [file NIHMS741639-supplement.pdf]

## APPENDIX

### Credit Roster VIP-HIP Study Group

(C= Coordinator, EA=Educational Assessor; EE=Eye Examiner; PI=Principal Investigator)\*:

***Pennsylvania College of Optometry at Salus University:*** Elise Ciner, OD (PI, EE); Whitley Harbison (C, EA); Zack Margolies, MSW (EA); Sarah McHugh-Grant (C, EA); Erin Engle (EA); Richard Schulang, MEd (EA); Gale Orlansky, OD, MEd (EE); Leah Sack (C); Jasmine Campbell (C).

***The Ohio State University College of Optometry:*** Marjean Taylor Kulp, OD, MS (PI); Julie Preston, OD, PhD, MEd (EA); Andrew Toole, OD, PhD (EE); Tamara Oechslin, OD, MS (EE); Nancy Stevens, MS, RD, LD (C); Pam Wessel (C).

***New England College of Optometry:*** Bruce Moore, OD (PI); Marcia Feist-Moore, MEd (EA); Catherine Johnson, OD (EE); Stacy Lyons, OD (EE); Nicole Quinn, OD (EE); Renee Mills, BS (C).

***Data Coordinating Center at University of Pennsylvania:*** Maureen Maguire, PhD (PI); Maria Blanco; Mary Brightwell-Arnold; James Dattilo; Sandra Harkins; Christopher Helker, MSPH; Ellen Peskin, MA; Maxwell Pistilli, MS; Gui-Shuang Ying, PhD.

***VIP-HIP Executive Committee:*** Marjean Taylor Kulp, OD, MS (Study Chair); Elise Ciner, OD; Maureen Maguire, PhD; Bruce Moore, OD; Lynn Cyert, OD, PhD; Graham Quinn, MD, MSCE; Rowan Candy, PhD; Jill Pentimonti, PhD, Gui-Shuang Ying, PhD  
Educational Consultants: Robert H. Bradley, PhD, Laura Justice, PhD, CCC-SLP, Jill Pentimonti, PhD

Velma Dobson, PhD contributed to the design of the study

NEI Liaison: Maryann Redford, DDS, MPH

\*Individuals dually certified as a Coordinator and an Educational Assessor did not perform both roles for any one child.
